# Supplementary material
Source: PubMed Central journal article supplement (PMC1803752)
Supplement: plntphys_pp.106.092825_1.pdf [file plntphys_pp.106.092825_1.pdf]

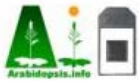

### Slides in this Experiment

- [Add all of these slides to the Slide Selection](#)
- [Download all of the ATH1 chip data for this experiment](#)

### Hybridisation Set: AtGenExpress: Leaves, rosettes, cotyledons,

Slide: ATGE\_1\_A

[Add to Slide Selection](#)

[Get the data!](#)

[Summary](#) [BioSource 1 Information](#)

[Extraction / Labelling Protocol for Source 1](#) [Slide Information](#)

[Hybridisation Analysis Information for "Affymetrix MAS 5.0 Scaling Protocol" normalised data.](#)

#### BioSource 1 Information

**BioSource Name:** ATGE\_1\_A      **Tissue:** cotyledons

**Organism:** Arabidopsis thaliana      **Plant Ontology terms for this tissue type:**

**Alias:** Col-0      **PO:0020030** cotyledon

**Stock Code:**      **Other Information:**

**Age:** 7days      *experimental\_background development baseline*

**Growth Conditions:**      **RNA-source** Weigel, Tübingen

**Photoperiod** continuous light

**Relative humidity** 65%

**Substrate** soil

**Temperature** 23oC

**Accession:** PO:0020030

**Aspect:** plant ontology

**Synonyms:** None

**Definition:**

A leaf or leaves formed at the first node of a sporophyte.

all : all ( 1897 )

① PO:0009075 : plant ontology ( 1897 )

① PO:0009011 : plant structure ( 1897 )

① PO:0009003 : sporophyte ( 1560 )

① PO:0006342 : infructescence ( 245 )

① PO:0009001 : fruit ( 245 )

① PO:0009010 : seed ( 221 )

① PO:0009009 : embryo ( 121 )

① PO:0020030 : cotyledon ( 19 )

① PO:0009010 : seed ( 221 )

① PO:0009009 : embryo ( 121 )

① PO:0020030 : cotyledon ( 19 )

① PO:0009006 : shoot ( 1344 )

① PO:0006001 : phyllome ( 1073 )

① PO:0020030 : cotyledon ( 19 )

## B.

Slide: ATGE\_1\_B

[Add to Slide](#)

[All Phenotype Associations](#)

[Summary](#) [BioSource 1 Information](#)

[Extraction / Labelling Protocol for Source 1](#) [Slide Information](#)

#### BioSource 1 Information

**BioSource Name:** ATGE\_1\_B      **Tissue:** cotyledons

**Organism:** Arabidopsis thaliana      **Plant Ontology terms for this tissue type:**

**Alias:** Col-0      **PO:0020030** cotyledon

**Stock Code:**      **Other Information:**

**Age:** 7days      *experimental\_background development baseline*

**Growth Conditions:**      **RNA-source** Weigel, Tübingen

| Name | Type | Datasource | Species | Evidence | Description |
|------|------|------------|---------|----------|-------------|
|------|------|------------|---------|----------|-------------|

#### cotyledon

|       |           |      |            |     |                          |
|-------|-----------|------|------------|-----|--------------------------|
| N262  | germplasm | NASC | A.thaliana | IMP | accumulation and replica |
| N325  | germplasm | NASC | A.thaliana | IMP | semhabmut (F38)          |
| N3813 | germplasm | NASC | A.thaliana | IMP | extra cotyledon          |
| N382  | germplasm | NASC | A.thaliana | IMP | semrosflor (F108)        |
| N383  | germplasm | NASC | A.thaliana | IMP | folflormut (F109)        |
| N394  | germplasm | NASC | A.thaliana | IMP | semfolmut (F122)         |
| N395  | germplasm | NASC | A.thaliana | IMP | semhabmut (F124)         |
| N407  | germplasm | NASC | A.thaliana | IMP | foliomut (F138)          |
