# Supplementary material
Source: PubMed Central journal article supplement (PMC1803752)
Supplement: plntphys_pp.106.092825_3.pdf [file plntphys_pp.106.092825_3.pdf]

## inflorescence

**Accession:** PO:0009049

**Ontology:** plant\_structure

**Synonyms:**

catkin  
cob (sensu Sorghum)  
corymb  
cyme  
dichasium  
drepanium  
helicoïd cyme  
monochasium  
panicle  
raceme  
rhipidium  
scorpioid cyme  
spike (sensu Triticeae)  
umbel  
verticillaster

**Definition:**

That part of the axial system of plants above the uppermost foliage leaf/pair of foliage leaves that bears flowers.

**Comment:**

Some plants have only solitary flowers, e.g. Magnolia.

### Term Lineage

all : all ( 6205 )

① PO:0009011 : plant structure ( 6126 )

① PO:0009003 : sporophyte ( 5605 )

① PO:0009006 : shoot ( 4075 )

① PO:0009049 : inflorescence ( 1323 )

[Graphical View](#)
